# Supplementary material for: Preparation and electrochemical Li storage performance of MnO@C nanorods consisting of ultra small MnO nanocrystals
Source: Royal Society of Chemistry journal article supplement (doi:10.1039/c3ra40546j), 2013-01-01
Supplement: c3ra40546j.pdf [file c3ra40546j.pdf]

Electronic Supplementary Information (ESI)

## Preparation and Electrochemical Li Storage Performance of MnO@C Nanorods Consisting of Ultra Small MnO Nanocrystals

Liwei Su, Yiren Zhong, Jinping Wei and Zhen Zhou\*

*Tianjin Key Laboratory of Metal and Molecule Based Material Chemistry, Key Laboratory of Advanced Energy Materials Chemistry (Ministry of Education), Institute of New Energy Material Chemistry, Nankai University, Tianjin 300071, P. R. China*

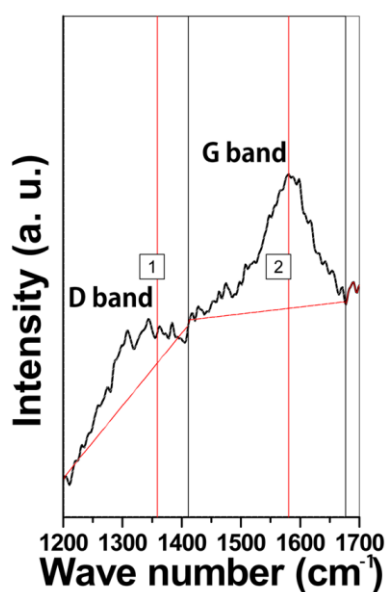

Fig. S1 Raman spectrum of MnO@C (600 °C).

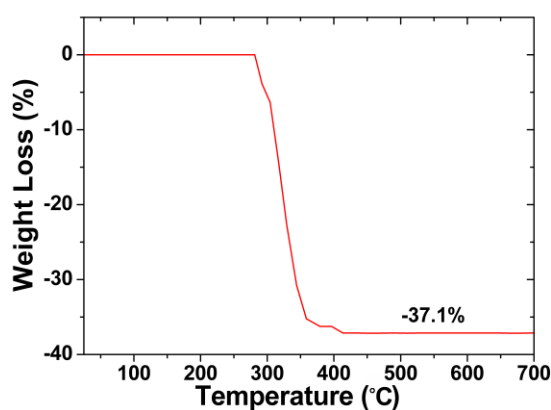

Fig. S2 TG analysis of MnO@C nanorods (600 °C).

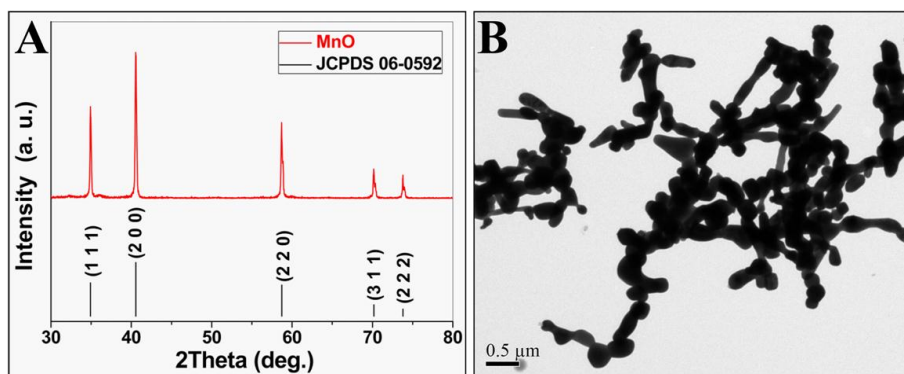

**Fig. S3** XRD pattern (A) and SEM image (B) of pure MnO.
